# Supplementary material for: Prevalences and Interrelationships of Post COVID-19 Fatigue, Sleep Disturbances, and Depression in Healthy Young and Middle-Aged Adults
Source: MDPI journal article supplement (doi:10.3390/jcm13102801), 2024-05-09
Supplement: s1 [file s1]

**Table S1. IRB numbers of participating hospitals**

| No. | Participating Hospital                          | IRB number      | Approval date     |
|-----|-------------------------------------------------|-----------------|-------------------|
| 1   | Korea University Guro Hospital                  | 2022GR0028      | January 13, 2022  |
| 2   | Jeju National University Hospital               | 2021-12-012     | January 18, 2022  |
| 3   | Chungnam National University Sejong Hospital    | 2022-01-017-001 | February 4, 2022  |
| 4   | Inje University Busan Paik Hospital             | 2022-01-008     | January 24, 2022  |
| 5   | Chungbuk National University Hospital           | 2021-12-020-002 | January 27, 2022  |
| 6   | Inje University Sanggye Paik Hospital           | 2021-12-008     | January 21, 2022  |
| 7   | Pusan National University Yangsan Hospital      | 05-2022-018     | January 19, 2022  |
| 8   | Chung-Ang University Hospital                   | 2112-032-489    | January 31, 2022  |
| 9   | Korea University Anam Hospital                  | 2022AN0028      | January 17, 2022  |
| 10  | Konyang University Hospital                     | 2022-01-013     | March 2, 2022     |
| 11  | Gyeongsan National University Changwon Hospital | 2022-01-017     | February 3, 2022  |
| 12  | Konkuk University                               | 2022-01-006     | February 24, 2022 |

**Table S2. Comparison of average scores on the Korean version of the Pittsburgh Sleep Quality Index items between 3 months and 6 months.**

| Items                      | 3 months  | 6 months  | P value |
|----------------------------|-----------|-----------|---------|
| Sleep quality              | 1.25±0.64 | 1.25±0.67 | 0.721   |
| Sleep latency              | 1.48±0.86 | 1.42±0.86 | 0.086   |
| Sleep duration             | 1.21±0.92 | 1.22±0.89 | 0.968   |
| Habitual sleep efficiency  | 0.46±0.87 | 0.43±0.80 | 0.520   |
| Sleep disturbance          | 1.02±0.43 | 0.99±0.51 | 0.087   |
| Use of sleeping medication | 0.08±0.41 | 0.08±0.39 | 0.744   |
| Daytime dysfunction        | 0.99±0.88 | 0.82±0.83 | <0.001  |

Data are presented as mean ± standard deviation. The mean scores of items in the Korean version of the Pittsburgh Sleep Quality Index at 3 months and at 6 months were compared using a paired t-test.

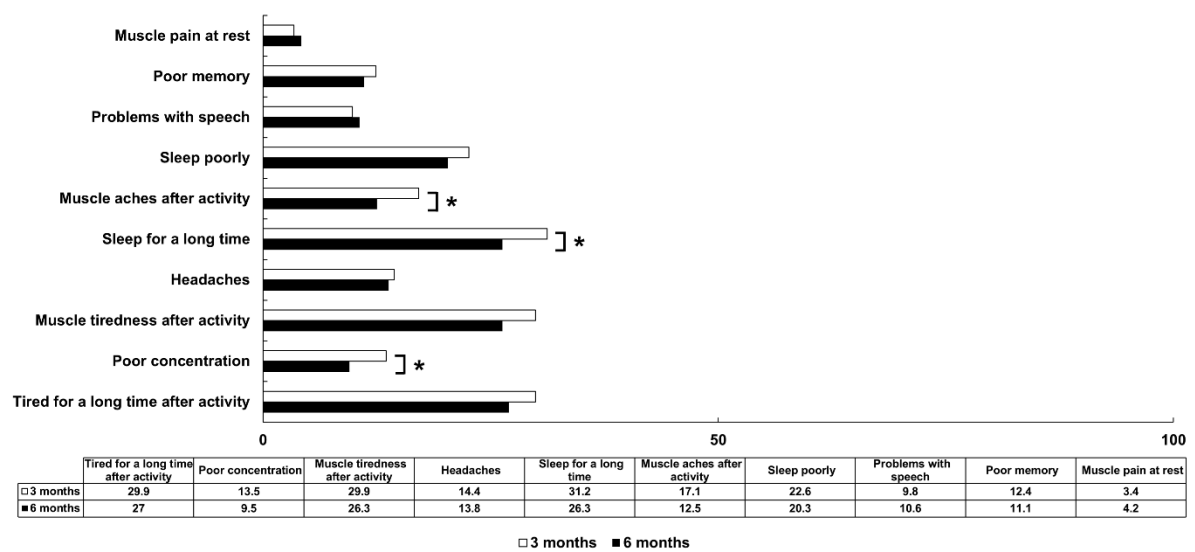

**Figure S1.** Variation of each item in the Schedule of Fatigue and Anergy/General Physician questionnaire at 3 months and at 6 months after COVID-19 infection.
